# Supplementary material for: Construction and characterization of centromeric plasmids for Komagataella phaffii using a color-based plasmid stability assay
Source: PubMed Central journal article supplement (PMC7332064; doi:10.1371/journal.pone.0235532), 2020-07-02

**S1 Fig. (A) Map of vector pPICH-ADE3.** ARS1 was used as the autonomously replicating sequence and *Sh ble* was used as the zeocin resistance marker. The *NotI* site was used for cloning the *K. phaffii ADE3* gene. Images were generated using SnapGene 5.0.7.

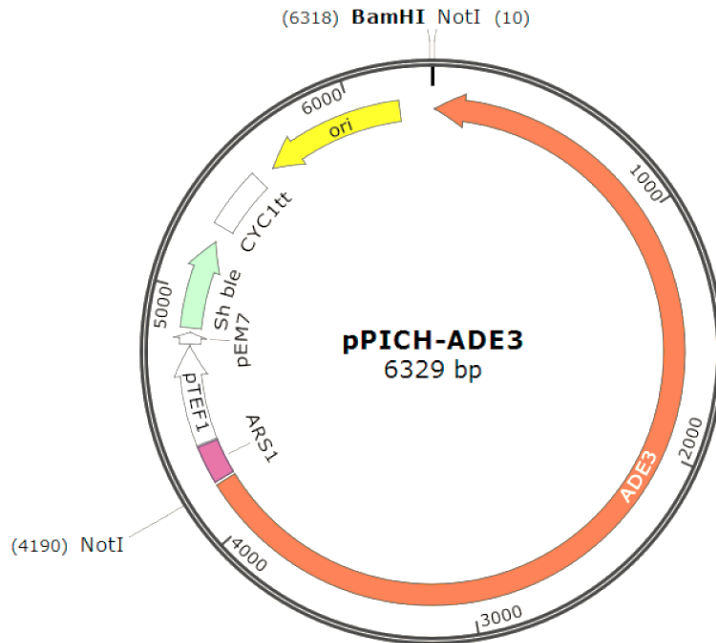

**(B) Maps of the centromeric plasmids constructed in this study.** Plasmids pPICH-CEN1, pPICH-CEN2, and pPICH-CEN4. Images were generated using SnapGene 5.0.7.

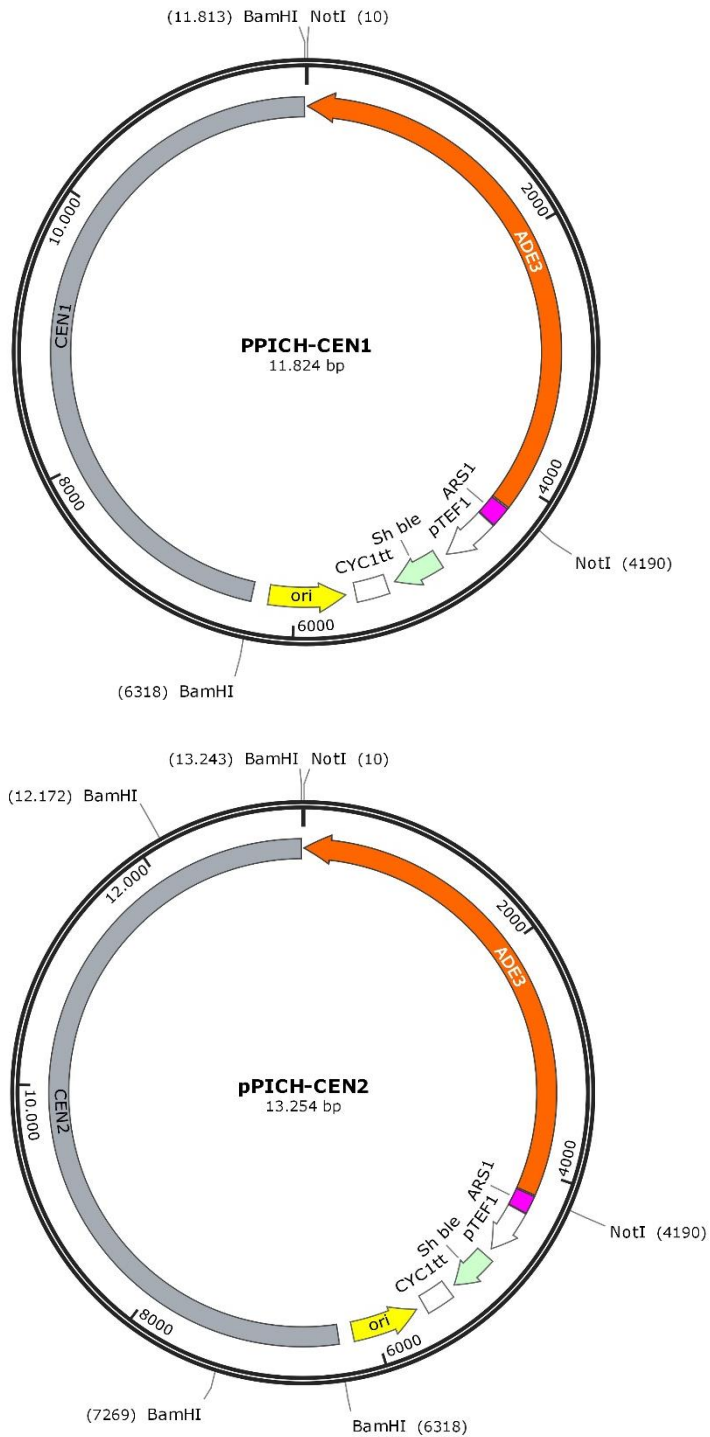

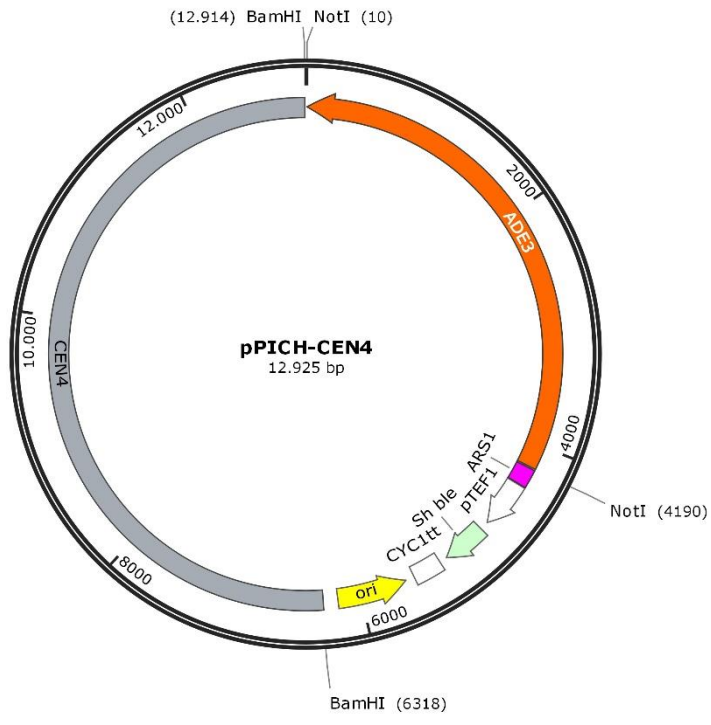

Supplement: pone.0235532.s001.pdf [file pone.0235532.s001.pdf]
