# Supplementary material for: Construction and characterization of centromeric plasmids for Komagataella phaffii using a color-based plasmid stability assay
Source: PubMed Central journal article supplement (PMC7332064; doi:10.1371/journal.pone.0235532), 2020-07-02

**S2 Fig. (A) Restriction analysis of recovered plasmids pPICH-CEN1, 2, and 4.**

Plasmids were digested with *NotI* and analyzed on 1% agarose gel. All digested plasmids yielded a common 4.2 kb band that represents the *ADE3* gene. The sizes of the upper bands represent the sum of individual centromeres and other common vector sequences (CEN1 = 7.6 kb; CEN2 = 9.0 kb; CEN4 = 8.7 kb). The upper band on pPICH-CEN1-*NotI* represents a partial digestion. M: 1 kb Plus DNA Ladder (Thermo Fisher Scientific). **(B) Restriction analysis of pPICH-ADE3.** The plasmid was digested with *NotI* and analyzed on 1% agarose gel. The 4.2-kb band represents the *ADE3* gene, and the 2.2-kb band represents the selection marker and *E. coli* sequences. M: 1kb Ladder Plus (Sinapse Inc).

**(A)**

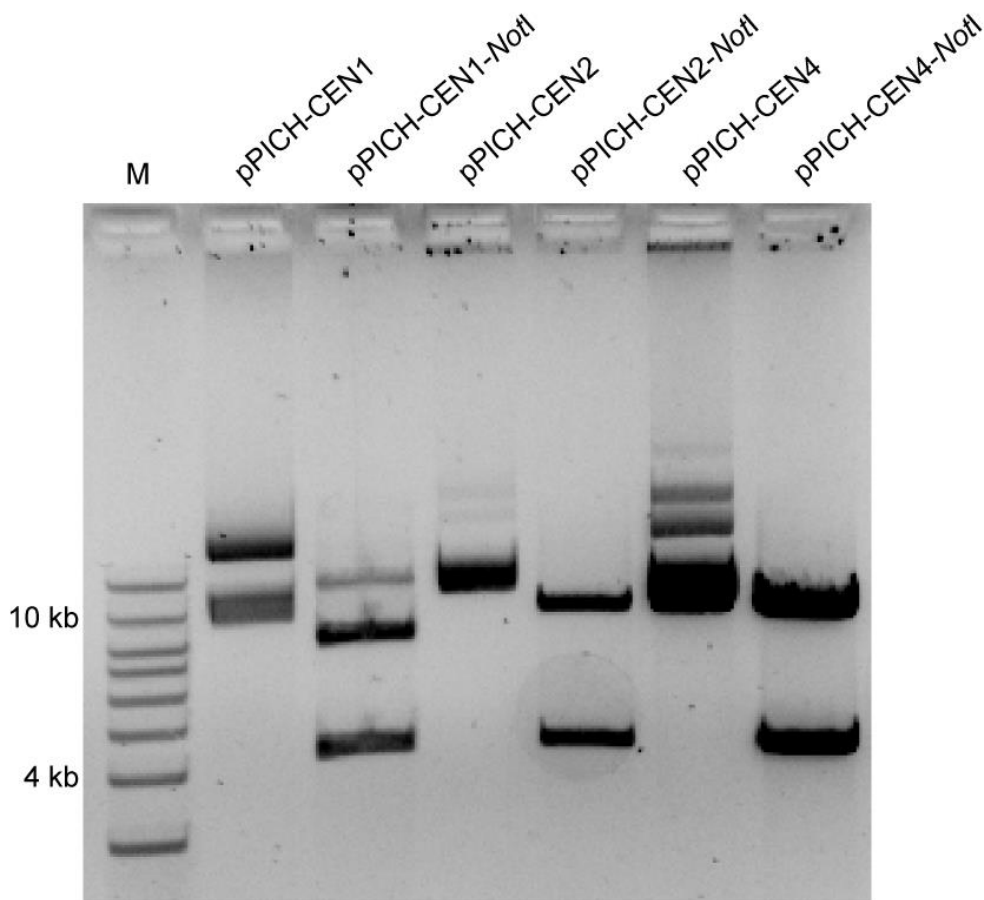

Supplement: pone.0235532.s002.pdf [file pone.0235532.s002.pdf]
