# Supplementary material for: Construction and characterization of centromeric plasmids for Komagataella phaffii using a color-based plasmid stability assay
Source: PubMed Central journal article supplement (PMC7332064; doi:10.1371/journal.pone.0235532), 2020-07-02
Supplement: pone.0235532.s004.pdf [file pone.0235532.s004.pdf]

**S1 Table.** Transformation efficiencies obtained in 3 transformation events with pPICH-ADE3 and pPICH-CEN1-4.

| <b>Plasmid</b> | <b>Transformation efficiency (CFU/<math>\mu</math>g DNA) <math>\pm</math> standard deviation (n=3)</b> |
|----------------|--------------------------------------------------------------------------------------------------------|
| pPICH-ADE3     | 825 $\pm$ 104                                                                                          |
| pPICH-CEN1     | 98 $\pm$ 39                                                                                            |
| pPICH-CEN2     | 60 $\pm$ 72                                                                                            |
| pPICH-CEN4     | 10 $\pm$ 8                                                                                             |
